# Supplementary material for: Combined Abiotic Stresses Repress Defense and Cell Wall Metabolic Genes and Render Plants More Susceptible to Pathogen Infection
Source: MDPI journal article supplement (doi:10.3390/plants10091946), 2021-09-18
Supplement: s1 [file s1]

**Supplementary Table S3:** Real time RT-PCR primer sequences used in this study.

| Primer            | Sequence                 |
|-------------------|--------------------------|
| <i>PR-1</i> (S)   | ACTACAACTACGCTGCGAACAC   |
| <i>PR-1</i> (A)   | GTTACACCTCACTTTGGCACATC  |
| <i>PR-5</i> (S)   | GTG TTCATCACAAGCGGCAT    |
| <i>PR-5</i> (A)   | GGGAAGCACCTGGAGTCAAT     |
| <i>TN13</i> (S)   | CCACCAAAACGAAAAGAGCTTG   |
| <i>TN13</i> (A)   | TCGTATTCCGTTCCGTTCCG     |
| <i>PDF1-3</i> (S) | AAGACTAACTCTTCACCAGTTCAC |
| <i>PDF1-3</i> (A) | CGGTGCTTCAAAAGCAGCAA     |
| <i>BOS1</i> (S)   | CCCGTTGGGGAAATAGATGGT    |
| <i>BOS1</i> (A)   | CCGAGGCTGACTGAATCCTC     |
| <i>THI2-2</i> (S) | CGAAAATTCTGGTGATGCTGTCA  |
| <i>THI2-2</i> (A) | TAGATCCTCCGGTGCAGACA     |
| <i>XTH20</i> (S)  | TCCCCAAAGGGTCATTTTACAATA |
| <i>XTH20</i> (A)  | GCGGTGAAAGGAGCTTTGGA     |
| <i>FLA2</i> (S)   | CGGAGGCTTAACGGTGTTCT     |
| <i>FLA2</i> (A)   | AACGACTGGTAAACCGGCAT     |
| <i>expG</i> (S)   | GAGCTGAAGTGGCTTCCATGAC   |
| <i>expG</i> (A)   | GGTCCGACATACCCATGATCC    |

S: Sense, A: Antisense.
